# Supplementary material for: A Single Cell but Many Different Transcripts: A Journey into the World of Long Non-Coding RNAs
Source: MDPI journal article supplement (doi:10.3390/ijms21010302), 2020-01-01
Supplement: s1 [file s1]

**Table S3.** Interactions between lncRNAs and other molecules.

This table contains a list of human lncRNAs divided into groups depending on their known interactions with DNA, Proteins or other RNA molecules. The references to the papers validating the lncRNA interactions are easily accessible by clicking the numbers near the name of the gene while clicking on the name itself will link to the ncbi page for that gene.

Data has been obtained from the database [EVLncRNAs](#)<sup>[0]</sup>.

|                | Binding                                                                                                                                                                                                                                                                                                                                                                         | Co-Expression                                                            | Regulation                                                                                                                                                                                                                                                                                                                                                                                                                                                                                                                                                                                                                                                                                                                                                                                                                                                                                                                                                                                                                                                                                                                                                                                                                                                                                                                                                                                                                                                                                                                                                                                                                                                                                                                                                                                                                                                                            |
|----------------|---------------------------------------------------------------------------------------------------------------------------------------------------------------------------------------------------------------------------------------------------------------------------------------------------------------------------------------------------------------------------------|--------------------------------------------------------------------------|---------------------------------------------------------------------------------------------------------------------------------------------------------------------------------------------------------------------------------------------------------------------------------------------------------------------------------------------------------------------------------------------------------------------------------------------------------------------------------------------------------------------------------------------------------------------------------------------------------------------------------------------------------------------------------------------------------------------------------------------------------------------------------------------------------------------------------------------------------------------------------------------------------------------------------------------------------------------------------------------------------------------------------------------------------------------------------------------------------------------------------------------------------------------------------------------------------------------------------------------------------------------------------------------------------------------------------------------------------------------------------------------------------------------------------------------------------------------------------------------------------------------------------------------------------------------------------------------------------------------------------------------------------------------------------------------------------------------------------------------------------------------------------------------------------------------------------------------------------------------------------------|
| <b>RNA-DNA</b> | AL121845.1 <sup>[1]</sup> , CDKN2B-AS1 <sup>[2]</sup> ,<br>CYTOR <sup>[3]</sup> , HOTAIR <sup>[4][5]</sup> ,<br>KCNQ1OT1 <sup>[6][7]</sup> , Khps1 <sup>[8]</sup> , MALAT1 <sup>[9]</sup> ,<br>NEAT1 <sup>[10]</sup> , PARTICL <sup>[11]</sup> ,<br>RBM5-AS1 <sup>[12]</sup> , RNY1 <sup>[13]</sup> , UCA1 <sup>[14]</sup> ,<br>ULK4P2 <sup>[15]</sup> , WT1-AS <sup>[16]</sup> | FRLnc1 <sup>[17]</sup> , HOTAIRM1 <sup>[18]</sup> , MEG3 <sup>[19]</sup> | AATBC <sup>[20]</sup> , AC021078.1 <sup>[21]</sup> , alpha-280/250 <sup>[22]</sup> ,<br>BACE1-AS <sup>[23]</sup> , BANCRC <sup>[24][25]</sup> , BOK-AS1 <sup>[26]</sup> ,<br>BRCA1 <sup>[27]</sup> , C1orf74 <sup>[28]</sup> , CAR Intergenic 10 <sup>[29]</sup> ,<br>CCDC26 <sup>[30]</sup> , CCEPR <sup>[31]</sup> , CDKN2B-AS1 <sup>[32]</sup> ,<br>DANCR <sup>[37]</sup> , DHFR upstream transcripts <sup>[38]</sup> ,<br>DHRS4-AS1 <sup>[39]</sup> , EGFR-AS1 <sup>[40]</sup> ,<br>ENST00000414355 <sup>[41]</sup> , FALEC <sup>[42]</sup> ,<br>FOXC2-AS1 <sup>[43]</sup> , FOXCUT <sup>[44]</sup> , GAS5 <sup>[45]</sup> , H19 <sup>[46]</sup> ,<br>HIF1A-AS1 <sup>[49]</sup> , HOTAIR <sup>[50]</sup> , HOTAIRM1 <sup>[61]</sup> ,<br>HOTTIP <sup>[62]</sup> , HOXA11-AS <sup>[66]</sup> , HOXA-AS <sup>[67]</sup> ,<br>HULC <sup>[68]</sup> , IRAIN <sup>[69]</sup> , KCNQ1OT1 <sup>[70]</sup> ,<br>LINC00261 <sup>[71]</sup> , LINC00312 <sup>[72]</sup> , LINC00951 <sup>[73]</sup> ,<br>LINC00964 <sup>[74]</sup> , LINC01024 <sup>[75]</sup> , LINC01207 <sup>[76]</sup> ,<br>LINC-ROR <sup>[77]</sup> , Lnc34a <sup>[78]</sup> , lncARSR <sup>[79]</sup> ,<br>lncRNA-422 <sup>[57]</sup> , lncRNA-AK058803 <sup>[80]</sup> ,<br>lncRNA-ATB <sup>[81]</sup> , LOC401317 <sup>[82]</sup> , LUADT1 <sup>[83]</sup> ,<br>MALAT1 <sup>[84]</sup> , MDC1-AS1 <sup>[89]</sup> , MEG3 <sup>[90]</sup> , MINCR <sup>[94]</sup> ,<br>ncRNACCND1 <sup>[95]</sup> , NCRUPAR <sup>[96]</sup> , NRAV <sup>[97]</sup> ,<br>OR3A4P <sup>[98]</sup> , PANDAR <sup>[99]</sup> , PCA3 <sup>[100]</sup> ,<br>PCAT1 <sup>[101][102]</sup> , PICSAR <sup>[103]</sup> , PTCSC3 <sup>[104]</sup> ,<br>PVT1 <sup>[105]</sup> , SNCG <sup>[108]</sup> , SNED1 <sup>[109]</sup> , SNHG12 <sup>[110]</sup> ,<br>SPRY4-IT1 <sup>[111]</sup> , SRA1 <sup>[112]</sup> , TRAF3IP2-AS1 <sup>[113]</sup> , |

|                    |                                                                                                                                                                                                                                                                                                                                                                                                                                                                                                                                                                                                                                                                                                                                                                                                                                                                                                                                                                                                                                                                                                                                                                                                                                                                                                                                                                                                                                                                                                                                                                                                                                                            |                                                                                                                                                                                                                                                                                                          |                                                                                                                                                                                                                                                                                                                                                                                                                                                                                                                                                                                                                                                                                                                                                                                                                                                                                                                                                                                                                                                                                                                                                                                                                                                                                                                                                                                                                                                                                                                                                                                                                                                                                                                                                                                                                                                                                                                                                                                                                                                                                                                                                                                                                                                                                                                                                                                                                                                   |
|--------------------|------------------------------------------------------------------------------------------------------------------------------------------------------------------------------------------------------------------------------------------------------------------------------------------------------------------------------------------------------------------------------------------------------------------------------------------------------------------------------------------------------------------------------------------------------------------------------------------------------------------------------------------------------------------------------------------------------------------------------------------------------------------------------------------------------------------------------------------------------------------------------------------------------------------------------------------------------------------------------------------------------------------------------------------------------------------------------------------------------------------------------------------------------------------------------------------------------------------------------------------------------------------------------------------------------------------------------------------------------------------------------------------------------------------------------------------------------------------------------------------------------------------------------------------------------------------------------------------------------------------------------------------------------------|----------------------------------------------------------------------------------------------------------------------------------------------------------------------------------------------------------------------------------------------------------------------------------------------------------|---------------------------------------------------------------------------------------------------------------------------------------------------------------------------------------------------------------------------------------------------------------------------------------------------------------------------------------------------------------------------------------------------------------------------------------------------------------------------------------------------------------------------------------------------------------------------------------------------------------------------------------------------------------------------------------------------------------------------------------------------------------------------------------------------------------------------------------------------------------------------------------------------------------------------------------------------------------------------------------------------------------------------------------------------------------------------------------------------------------------------------------------------------------------------------------------------------------------------------------------------------------------------------------------------------------------------------------------------------------------------------------------------------------------------------------------------------------------------------------------------------------------------------------------------------------------------------------------------------------------------------------------------------------------------------------------------------------------------------------------------------------------------------------------------------------------------------------------------------------------------------------------------------------------------------------------------------------------------------------------------------------------------------------------------------------------------------------------------------------------------------------------------------------------------------------------------------------------------------------------------------------------------------------------------------------------------------------------------------------------------------------------------------------------------------------------------|
|                    |                                                                                                                                                                                                                                                                                                                                                                                                                                                                                                                                                                                                                                                                                                                                                                                                                                                                                                                                                                                                                                                                                                                                                                                                                                                                                                                                                                                                                                                                                                                                                                                                                                                            |                                                                                                                                                                                                                                                                                                          | TUG1 <sup>[21]</sup> , TUNAR <sup>[114]</sup> , TUSC7 <sup>[115]</sup> , ZEB1-AS1 <sup>[116]</sup> , ZFAS1 <sup>[117]</sup>                                                                                                                                                                                                                                                                                                                                                                                                                                                                                                                                                                                                                                                                                                                                                                                                                                                                                                                                                                                                                                                                                                                                                                                                                                                                                                                                                                                                                                                                                                                                                                                                                                                                                                                                                                                                                                                                                                                                                                                                                                                                                                                                                                                                                                                                                                                       |
| <b>RNA-Protein</b> | Alu lncRNAs <sup>[118]</sup> , AOC4P <sup>[119]</sup> ,<br>ASncmtRNAs <sup>[120]</sup> , BCYRN1 <sup>[121]</sup> ,<br>BCYRN1P2 <sup>[128]</sup> , CDKN2B-AS1 <sup>[32]</sup> ,<br>CTBP1-AS <sup>[134]</sup> , CYTOR <sup>[135]</sup> ,<br>DHFR upstream transcripts <sup>[38]</sup> ,<br>EWSAT1 <sup>[136]</sup> , FENDRR <sup>[137]</sup> ,<br>GAS5 <sup>[138]</sup> , GSTT1-AS1 <sup>[141]</sup> , H19 <sup>[142]</sup> ,<br>HEIH <sup>[146]</sup> , HOTAIR <sup>[50]</sup> , HOTTIP <sup>[62]</sup> ,<br>HOXA-AS2 <sup>[153]</sup> , KCNQ1OT1 <sup>[154]</sup> ,<br>KIR antisense lncRNA <sup>[155]</sup> ,<br>LINC01207 <sup>[76]</sup> , lincDR1 <sup>[137]</sup> ,<br>lincGARS <sup>[137]</sup> , lincMLKN1 <sup>[137]</sup> ,<br>LINC-ROR <sup>[156]</sup> , lincSFPQ <sup>[137]</sup> ,<br>lnc13 <sup>[157]</sup> , LUADT1 <sup>[83]</sup> , MALAT1 <sup>[158]</sup> ,<br>MEG3 <sup>[90]</sup> , MIAT <sup>[162]</sup> , MT1JP <sup>[163]</sup> ,<br>ncRNACCND1 <sup>[112]</sup> , NEAT1 <sup>[164]</sup> ,<br>NKILA <sup>[171]</sup> , NRON <sup>[172]</sup> ,<br>OIP5-AS1 <sup>[173]</sup> , PAN <sup>[174]</sup> , PARTICL <sup>[11]</sup> ,<br>PCAT1 <sup>[175]</sup> , PCNA-AS1 <sup>[176]</sup> ,<br>pncRNA-D <sup>[177]</sup> ,<br>Prion-associated RNAs <sup>[178]</sup> ,<br>PVT1 <sup>[179][107]</sup> , RN7SK <sup>[180]</sup> ,<br>RN7SL1 <sup>[204]</sup> , RRP1B <sup>[207]</sup> ,<br>SARCC <sup>[208]</sup> , SPRY4-IT1 <sup>[209]</sup> ,<br>SRA1 <sup>[210]</sup> , TINCR <sup>[216]</sup> , TUG1 <sup>[137]</sup> ,<br>UCA1 <sup>[14]</sup> , WFDC21P <sup>[219]</sup> ,<br>WSPAR <sup>[220][221]</sup> , XIST <sup>[150]</sup> | AC100861.1 <sup>[222]</sup> , BCYRN1 <sup>[125]</sup> ,<br>CCAT1 <sup>[223]</sup> , CDKN2B-AS1 <sup>[224]</sup> ,<br>CPS1-IT1 <sup>[225]</sup> , DLEU1 <sup>[226]</sup> , H19 <sup>[227]</sup> ,<br>HOTAIR <sup>[228]</sup> , HOTTIP <sup>[229]</sup> ,<br>MVIH <sup>[230]</sup> , UCA1 <sup>[231]</sup> | AB073614 <sup>[232]</sup> , AF339813 <sup>[233]</sup> ,<br>AFAP1-AS1 <sup>[234][235]</sup> , AOC4P <sup>[236]</sup> ,<br>APOA1-AS <sup>[237]</sup> , ASncmtRNAs <sup>[120]</sup> ,<br>AT102202 <sup>[238]</sup> , BACE1-AS <sup>[239]</sup> , BALR-6 <sup>[240]</sup> ,<br>BANCER <sup>[241][242]</sup> , BRCA1 <sup>[27]</sup> , BX647187 <sup>[243]</sup> ,<br>CBR3-AS1 <sup>[244]</sup> , CCAL <sup>[245]</sup> ,<br>CDKN2B-AS1 <sup>[246][247]</sup> , DACOR1 <sup>[248]</sup> ,<br>DANCER <sup>[249]</sup> , DBET <sup>[250]</sup> , DBH-AS1 <sup>[251]</sup> ,<br>DLEU2 <sup>[252]</sup> , DLX6-AS1 <sup>[253]</sup> , FALEC <sup>[254]</sup> ,<br>FAM30A <sup>[255]</sup> , FENDRR <sup>[256]</sup> , FTX <sup>[257]</sup> ,<br>GAS1RR <sup>[258]</sup> , GAS5 <sup>[167]</sup> , H19 <sup>[265]</sup> , HBB <sup>[274]</sup> ,<br>HIF2PUT <sup>[275]</sup> , HNF1A-AS1 <sup>[276]</sup> , HOTAIR <sup>[50]</sup> ,<br>HOTTIP <sup>[285][286]</sup> , HOXA-AS2 <sup>[153]</sup> , HULC <sup>[287]</sup> ,<br>IFNG-AS1 <sup>[291][292]</sup> , IL7R <sup>[293]</sup> , ILF3 <sup>[81]</sup> ,<br>LINC00635 <sup>[294]</sup> , LINC00668 <sup>[295]</sup> , LINC00982 <sup>[296]</sup> ,<br>LINC01158 <sup>[297]</sup> , LINC01426 <sup>[298]</sup> , linc-ITGB1 <sup>[299]</sup> ,<br>LINC-ROR <sup>[300]</sup> , LINK-A <sup>[301]</sup> , lnc-bc060912 <sup>[302]</sup> ,<br>lnc-DILC <sup>[303]</sup> , LUNAR1 <sup>[304]</sup> , MALAT1 <sup>[305]</sup> ,<br>MEG3 <sup>[167]</sup> , MIAT <sup>[321]</sup> , MIR31HG <sup>[322][323]</sup> ,<br>MT1DP <sup>[324]</sup> , MT1JP <sup>[163]</sup> , NALT1 <sup>[325]</sup> , NBAT1 <sup>[326]</sup> ,<br>NBR2 <sup>[327]</sup> , NCRUPAR <sup>[328]</sup> , NEAT1 <sup>[329][330]</sup> ,<br>NORAD <sup>[331]</sup> , NRON <sup>[332][167]</sup> , PACERR <sup>[333]</sup> ,<br>PCAT5 <sup>[334]</sup> , PCOTH <sup>[335]</sup> , POU6F2-AS2 <sup>[336]</sup> ,<br>PRAL <sup>[337]</sup> , PRINS <sup>[338]</sup> , PVT1 <sup>[339][340]</sup> ,<br>RAD51-AS1 <sup>[341]</sup> , RGMB-AS1 <sup>[342]</sup> , RMST <sup>[343]</sup> ,<br>RN7SK <sup>[344]</sup> , SAMMSON <sup>[352]</sup> , SFTA3 <sup>[353]</sup> ,<br>SIRT1-AS <sup>[354]</sup> , SNHG15 <sup>[355]</sup> , SRA1 <sup>[356][215]</sup> ,<br>TP53COR1 <sup>[357][358]</sup> , TP73-AS1 <sup>[359]</sup> , TSIX <sup>[360]</sup> ,<br>TUG1 <sup>[218][361]</sup> , TUSC7 <sup>[362][363]</sup> , UCA1 <sup>[364]</sup> , |

|                |                                                                                                                                                                                                                                                                                                                                                                                                                                                                                                                                                                                                                                                                                                                  |                                                                                                                                                                                                                                                                                                                                                                                                                                                                                                                                                                                                                                                                                                                                                                                                                                                                                                                                                                            |                                                                                                                                                                                                                                                                                                                                                                                                                                                                                                                                                                                                                                                                                                                                                                                                                                                                                                                                                                                                                                                                                                                                                                                                                                                                                                                         |
|----------------|------------------------------------------------------------------------------------------------------------------------------------------------------------------------------------------------------------------------------------------------------------------------------------------------------------------------------------------------------------------------------------------------------------------------------------------------------------------------------------------------------------------------------------------------------------------------------------------------------------------------------------------------------------------------------------------------------------------|----------------------------------------------------------------------------------------------------------------------------------------------------------------------------------------------------------------------------------------------------------------------------------------------------------------------------------------------------------------------------------------------------------------------------------------------------------------------------------------------------------------------------------------------------------------------------------------------------------------------------------------------------------------------------------------------------------------------------------------------------------------------------------------------------------------------------------------------------------------------------------------------------------------------------------------------------------------------------|-------------------------------------------------------------------------------------------------------------------------------------------------------------------------------------------------------------------------------------------------------------------------------------------------------------------------------------------------------------------------------------------------------------------------------------------------------------------------------------------------------------------------------------------------------------------------------------------------------------------------------------------------------------------------------------------------------------------------------------------------------------------------------------------------------------------------------------------------------------------------------------------------------------------------------------------------------------------------------------------------------------------------------------------------------------------------------------------------------------------------------------------------------------------------------------------------------------------------------------------------------------------------------------------------------------------------|
|                |                                                                                                                                                                                                                                                                                                                                                                                                                                                                                                                                                                                                                                                                                                                  |                                                                                                                                                                                                                                                                                                                                                                                                                                                                                                                                                                                                                                                                                                                                                                                                                                                                                                                                                                            | UCHL1-AS1 <sup>[371]</sup> , VIM2P <sup>[372]</sup> , WSPAR <sup>[221]</sup> ,<br>XIST <sup>[373]</sup> , ZFAS1 <sup>[374]</sup>                                                                                                                                                                                                                                                                                                                                                                                                                                                                                                                                                                                                                                                                                                                                                                                                                                                                                                                                                                                                                                                                                                                                                                                        |
| <b>RNA-RNA</b> | BACE1-AS <sup>[375]</sup> , BDNF-AS <sup>[376][167]</sup> ,<br>CASC2 <sup>[377]</sup> , CCAT1 <sup>[378][379]</sup> ,<br>CD99P1 <sup>[380]</sup> , CTD-3080P12.3 <sup>[381]</sup> ,<br>GAS5 <sup>[382][264]</sup> , H19 <sup>[383]</sup> ,<br>HNF1A-AS1 <sup>[278]</sup> , HULC <sup>[38]</sup> ,<br>LINC01613 <sup>[380]</sup> , lncARSR <sup>[79]</sup> ,<br>LOC100129973 <sup>[386]</sup> , MALAT1 <sup>[387]</sup> ,<br>MVIH <sup>[388]</sup> , NUTF2P3 <sup>[389]</sup> ,<br>PCGEM1 <sup>[390]</sup> , PINK1-AS <sup>[391]</sup> ,<br>RN7SL1 <sup>[167]</sup> , SIRT1-AS <sup>[392]</sup> ,<br>TGFB2-OT1 <sup>[393][394]</sup> , TUSC7 <sup>[363]</sup> ,<br>UCA1 <sup>[395]</sup> , ZFAS1 <sup>[117]</sup> | ATXN8OS <sup>[397]</sup> , BACE1-AS <sup>[375]</sup> ,<br>C5T1lncRNA <sup>[398]</sup> , CADM1 <sup>[399]</sup> ,<br>CDKN2B-AS1 <sup>[132]</sup> , CDR1-AS <sup>[400]</sup> ,<br>CYP4A22-AS1 <sup>[401]</sup> , DLEU1 <sup>[226]</sup> ,<br>EMX2OS <sup>[402]</sup> , FALEC <sup>[403]</sup> , FTX <sup>[257]</sup> ,<br>H19 <sup>[404]</sup> , HOTAIR <sup>[407]</sup> ,<br>HOTAIRM1 <sup>[132]</sup> , HOTTIP <sup>[132][408]</sup> ,<br>HOXA11-AS <sup>[409]</sup> , LINC00570 <sup>[401]</sup> ,<br>LINC00853 <sup>[401]</sup> , LINC00974 <sup>[410]</sup> ,<br>LINC01612 <sup>[411]</sup> , LSINCT5 <sup>[412]</sup> ,<br>MEG3 <sup>[413]</sup> , ncRNA-a6 <sup>[401]</sup> ,<br>NUTF2P3 <sup>[389]</sup> , PCAT1 <sup>[175]</sup> ,<br>PCAT6 <sup>[401]</sup> , PRINS <sup>[414]</sup> ,<br>PTENP1 <sup>[415]</sup> , RBM4 <sup>[416]</sup> ,<br>RBM5-AS1 <sup>[12]</sup> , SRA1 <sup>[417][213]</sup> ,<br>XLOC_010235 <sup>[411]</sup> , ZEB2-AS1 <sup>[418]</sup> | asOct4-pg5 <sup>[419]</sup> , B4GALT1-AS1 <sup>[420]</sup> ,<br>BACE1-AS <sup>[239][375]</sup> , BANCRC <sup>[241]</sup> , BCYRN1 <sup>[127]</sup> ,<br>CADM1 <sup>[421]</sup> , CYP4A22-AS1 <sup>[403]</sup> ,<br>EGFLAM-AS1 <sup>[422]</sup> , EMX2OS <sup>[423]</sup> , FAS-AS1 <sup>[424]</sup> ,<br>FER1L4 <sup>[425]</sup> , FOXCUT <sup>[426]</sup> , FTX <sup>[427]</sup> , GAS5 <sup>[428]</sup> ,<br>H19 <sup>[268]</sup> , HIF2PUT <sup>[434]</sup> , HOTAIR <sup>[435]</sup> , HOTTIP <sup>[63]</sup> ,<br>HULC <sup>[289][290]</sup> , ICR <sup>[442]</sup> , LINC00570 <sup>[403]</sup> ,<br>LINC-ROR <sup>[300][443]</sup> , lncRNA-ATB <sup>[444]</sup> ,<br>LUNAR1 <sup>[445]</sup> , MALAT1 <sup>[435]</sup> , MEG3 <sup>[452]</sup> , MIAT <sup>[321]</sup> ,<br>MT-ND5 <sup>[456]</sup> , MT-ND6 <sup>[456]</sup> , ncRNA-a6 <sup>[403]</sup> ,<br>NEAT1 <sup>[457]</sup> , OIP5-AS1 <sup>[173]</sup> , PCAT6 <sup>[403]</sup> ,<br>PCGEM1 <sup>[458]</sup> , RN7SK <sup>[459]</sup> , SKP2 <sup>[460]</sup> ,<br>SOX2-OT <sup>[461]</sup> , SPRY4-IT1 <sup>[286]</sup> , TP53COR1 <sup>[358]</sup> ,<br>TRERNA1 <sup>[403][462]</sup> , TSIX <sup>[360]</sup> , TUG1 <sup>[463]</sup> ,<br>UCA1 <sup>[464]</sup> , UFC1 <sup>[465]</sup> , WRAP53 <sup>[466][467]</sup> ,<br>XIST <sup>[468]</sup> |
