# Supplementary material for: A Single Cell but Many Different Transcripts: A Journey into the World of Long Non-Coding RNAs
Source: MDPI journal article supplement (doi:10.3390/ijms21010302), 2020-01-01
Supplement: s1 [file s1]

**Table S2.** List of lncRNAs with a validated function.

This table contains a list of lncRNAs divided into groups depending on their known function. The references to the papers validating the lncRNA function are easily accessible by clicking the numbers near the name of the gene while clicking on the name itself will link to the ncbi page for that gene.

Data has been obtained from the database [LncBook](#)<sup>[9]</sup>.

| Function                   | Validated lncRNAs                                                                                                                                                                                                                                                                                                                                                                                                                                                                                                                                                                                                                                                                                                                                                                                                                                                                                                                                                                                                                                                                                                                                                                                                                                                                                                                                                                                                                                                                                                                                                                                                                                                                                                                                                                                                                                                                                                                                                                                                                                                                                                                                                                                                                                                                                                                                                                                                                                                                                                                                                                                                                                                                                                                                                                                                                                                                                                                                      |
|----------------------------|--------------------------------------------------------------------------------------------------------------------------------------------------------------------------------------------------------------------------------------------------------------------------------------------------------------------------------------------------------------------------------------------------------------------------------------------------------------------------------------------------------------------------------------------------------------------------------------------------------------------------------------------------------------------------------------------------------------------------------------------------------------------------------------------------------------------------------------------------------------------------------------------------------------------------------------------------------------------------------------------------------------------------------------------------------------------------------------------------------------------------------------------------------------------------------------------------------------------------------------------------------------------------------------------------------------------------------------------------------------------------------------------------------------------------------------------------------------------------------------------------------------------------------------------------------------------------------------------------------------------------------------------------------------------------------------------------------------------------------------------------------------------------------------------------------------------------------------------------------------------------------------------------------------------------------------------------------------------------------------------------------------------------------------------------------------------------------------------------------------------------------------------------------------------------------------------------------------------------------------------------------------------------------------------------------------------------------------------------------------------------------------------------------------------------------------------------------------------------------------------------------------------------------------------------------------------------------------------------------------------------------------------------------------------------------------------------------------------------------------------------------------------------------------------------------------------------------------------------------------------------------------------------------------------------------------------------------|
| ceRNA                      | APF <sup>[1]</sup> , ATB <sup>[2][3][4][5]</sup> , BC032469 <sup>[6]</sup> , BGLT3 <sup>[7]</sup> , CARL <sup>[8]</sup> , CASC2 <sup>[9]</sup> , CAT104 <sup>[10]</sup> , CBR3-AS1 <sup>[11]</sup> , CCAT1 <sup>[12][13][14][15][16]</sup> , CCDC144NL-AS1 <sup>[17]</sup> , CD99P1 <sup>[18]</sup> , CDKN2B-AS1 <sup>[19]</sup> , CDR1-AS <sup>[20]</sup> , CERNA1 <sup>[21]</sup> , CERNA2 <sup>[22]</sup> , CERNA3 <sup>[23]</sup> , CHRFB <sup>[24][25]</sup> , CRNDE <sup>[26][27]</sup> , CTB-89H12.4 <sup>[28]</sup> , CTD-3080P12.3 <sup>[6]</sup> , CYTOR <sup>[29][30]</sup> , DLEU1 <sup>[31]</sup> , DUBR <sup>[32]</sup> , FER1L4 <sup>[33][34]</sup> , FLJ90757 <sup>[35]</sup> , GAS5 <sup>[36][37][38][39][40]</sup> , H19 <sup>[41][42][43][44][45][46][47][48][49][50][51][52][53]</sup> , HNF1A-AS1 <sup>[54]</sup> , HOST2 <sup>[22]</sup> , HOTAIR <sup>[55][56][57][58][59][60][61][62][63][64][65]</sup> , HOXA11-AS <sup>[66]</sup> , HULC <sup>[67][68][69]</sup> , KIAA1614-AS1 <sup>[32]</sup> , KRASP1 <sup>[70]</sup> , LA16c-313D11.11 <sup>[71]</sup> , LINC00052 <sup>[72]</sup> , LINC00115 <sup>[73]</sup> , LINC00161 <sup>[74]</sup> , LINC00240 <sup>[75]</sup> , LINC00319 <sup>[76]</sup> , LINC00882 <sup>[32]</sup> , LINC00941 <sup>[77]</sup> , LINC00974 <sup>[78]</sup> , LINC01234 <sup>[10]</sup> , LINC01262 <sup>[79]</sup> , LINC01772 <sup>[80]</sup> , LINC01826 <sup>[81]</sup> , linc-223 <sup>[82]</sup> , LINCMD1 <sup>[83][84]</sup> , LINC-ROR <sup>[85][86][87][88][89][90]</sup> , lncARSR <sup>[91]</sup> , LNCRI <sup>[92][93]</sup> , lncRNA-ATB <sup>[2][3]</sup> , lncRNA-DLEU1 <sup>[94]</sup> , lncRNA-FER1L4 <sup>[95]</sup> , lnc-SCA7 <sup>[96]</sup> , LOC283663 <sup>[35]</sup> , LOC338651 <sup>[35]</sup> , MAGI1-IT1 <sup>[17]</sup> , MALAT1 <sup>[97][98][99][100][101][102][103][104][105][106][107][108]</sup> , MEG3 <sup>[109][110][111][73][112]</sup> , MHENCR <sup>[113]</sup> , MIAT <sup>[114][115][116][73]</sup> , MINCR <sup>[117]</sup> , MIR31HG <sup>[118]</sup> , MVIH <sup>[119]</sup> , NCK1-DT <sup>[120]</sup> , NEAT1 <sup>[121][122][123][124][125]</sup> , PARAL1 <sup>[126]</sup> , PCA3 <sup>[127]</sup> , PCAT1 <sup>[128]</sup> , PCGEM1 <sup>[129][130]</sup> , POIR <sup>[131]</sup> , PTCSC3 <sup>[132]</sup> , PTENP1 <sup>[133][134][135]</sup> , RMRP <sup>[136]</sup> , RP11-457M11.2 <sup>[137]</sup> , RP11-838N2.4 <sup>[138]</sup> , RSU1P2 <sup>[139]</sup> , SLC26A4-AS1 <sup>[17]</sup> , SNHG14 <sup>[140]</sup> , SNHG6 <sup>[141]</sup> , STXBP5-AS1 <sup>[10]</sup> , TGFB2-OT1 <sup>[142]</sup> , TMSB4 <sup>[143]</sup> , TUG1 <sup>[144][28][145][146]</sup> , TUSC7 <sup>[147][148]</sup> , UCA1 <sup>[149][150][151][152][153][154][155][63][156][157]</sup> , ucoo2kmd.1 <sup>[158]</sup> , UFC1 <sup>[159]</sup> , Unigene56159 <sup>[160]</sup> , XIST <sup>[161][162][163][164]</sup> , ZFAS1 <sup>[165][166]</sup> |
| Protein Localization       | 7SL <sup>[167]</sup> , MALAT1 <sup>[168]</sup> , NEAT1_2 <sup>[168]</sup> , POU6F2-AS2 <sup>[169]</sup>                                                                                                                                                                                                                                                                                                                                                                                                                                                                                                                                                                                                                                                                                                                                                                                                                                                                                                                                                                                                                                                                                                                                                                                                                                                                                                                                                                                                                                                                                                                                                                                                                                                                                                                                                                                                                                                                                                                                                                                                                                                                                                                                                                                                                                                                                                                                                                                                                                                                                                                                                                                                                                                                                                                                                                                                                                                |
| RNAi                       | CDKN2B-AS1 <sup>[170]</sup> , MEG3 <sup>[171]</sup> , SEC24B-AS1 <sup>[172]</sup>                                                                                                                                                                                                                                                                                                                                                                                                                                                                                                                                                                                                                                                                                                                                                                                                                                                                                                                                                                                                                                                                                                                                                                                                                                                                                                                                                                                                                                                                                                                                                                                                                                                                                                                                                                                                                                                                                                                                                                                                                                                                                                                                                                                                                                                                                                                                                                                                                                                                                                                                                                                                                                                                                                                                                                                                                                                                      |
| Splicing Regulation        | 51A <sup>[173]</sup> , ABALON <sup>[174]</sup> , BCYRN1 <sup>[175]</sup> , MALAT1 <sup>[176][177][178][179][180][134][181][182][183]</sup> , MIAT <sup>[184][185]</sup> , NPPA-AS1 <sup>[186][178]</sup> , TPM1-AS <sup>[187]</sup> , uc002yug.2 <sup>[188]</sup> , ZEB2-AS1 <sup>[189]</sup>                                                                                                                                                                                                                                                                                                                                                                                                                                                                                                                                                                                                                                                                                                                                                                                                                                                                                                                                                                                                                                                                                                                                                                                                                                                                                                                                                                                                                                                                                                                                                                                                                                                                                                                                                                                                                                                                                                                                                                                                                                                                                                                                                                                                                                                                                                                                                                                                                                                                                                                                                                                                                                                          |
| Transcriptional Regulation | 116HG <sup>[190]</sup> , 7SK <sup>[191][192][193][194][195]</sup> , 91H <sup>[196]</sup> , AGAP2-AS1 <sup>[197]</sup> , AIRN <sup>[198]</sup> , AK294004 <sup>[199]</sup> , APOA1-AS <sup>[200]</sup> , APOC1P1-3 <sup>[201]</sup> , APTR <sup>[202]</sup> , ASncmtRNAs <sup>[203]</sup> , ATXN8OS <sup>[204]</sup> , B4GALT1-AS1 <sup>[205]</sup> , BAALC-AS1 <sup>[206]</sup> , BACE1-AS <sup>[207]</sup> , BALR-6 <sup>[208]</sup> , BANC1 <sup>[209]</sup> , BC041488 <sup>[43]</sup> , BCAR4 <sup>[210][211][212]</sup> , BDNF-AS <sup>[213][214][190]</sup> , BLACAT1 <sup>[215]</sup> , C5T1lncRNA <sup>[216]</sup> , CADM1-AS1 <sup>[217]</sup> , CAMTA1-DT <sup>[218]</sup> , CAR Intergenic 10 <sup>[192]</sup> , CARD8-AS1 <sup>[219]</sup> , CARMN <sup>[220]</sup> , CASC11 <sup>[221]</sup> , CCAT1-L <sup>[222]</sup> , CCAT2 <sup>[223]</sup> , CCDC26 <sup>[224]</sup> , CCEPR <sup>[225]</sup> , CDKN1A-AS1 <sup>[226]</sup> , CDKN2B-AS1 <sup>[227][228][229][230][231][232][233][234][235][236][237][238][239][184][181][240][190][241][242]</sup> , CFTR-AS1 <sup>[243]</sup> , Chaer <sup>[244]</sup> , CISTR <sup>[245]</sup> , COL1A2-AS1 <sup>[246]</sup> , CRNDE <sup>[247][248]</sup> , CTBP1-AS <sup>[249][250][251][207]</sup> , CYP4A22-AS1 <sup>[252]</sup> , CYTOR <sup>[253][254]</sup> , DACOR1 <sup>[255]</sup> , DALIR <sup>[256]</sup> , DANC1 <sup>[257][258][259][260]</sup> , DANT1 <sup>[261]</sup> , DANT2 <sup>[261]</sup> , DBCCR1-003 <sup>[262]</sup> , DBET <sup>[263]</sup> , DGCR5 <sup>[264]</sup> , DHFR upstream transcripts <sup>[265]</sup> , DHRS4-AS1 <sup>[266]</sup> , DILC <sup>[267]</sup> , DISC1FP1 <sup>[268]</sup> , DISC2 <sup>[269]</sup> , DLEU1 <sup>[270][271]</sup> , DLEU2 <sup>[270][271]</sup> , DLX6-AS1 <sup>[272]</sup> , DQ786243 <sup>[273]</sup> , EBIC <sup>[274]</sup> , ELFN1-AS1 <sup>[275]</sup> , EMX2OS <sup>[276]</sup> , ERICD <sup>[277]</sup> , Evf2 <sup>[278]</sup> , EVI1 <sup>[279]</sup> , EWSAT1 <sup>[280]</sup> , FALEC <sup>[252][281]</sup> , FAS-AS1 <sup>[282]</sup> , FENDRR <sup>[283][284][285]</sup> , FEZF1-AS1 <sup>[286][286]</sup> , FGF10-AS1 <sup>[287]</sup> , FIRRE <sup>[288]</sup> , FLICR <sup>[289]</sup> , FMR1-AS1 <sup>[290]</sup> , FOXCUT <sup>[291]</sup> , FOXD3-AS1 <sup>[292]</sup> , FTX <sup>[293][294]</sup> , GAS5 <sup>[295]</sup> , GATA3-AS1 <sup>[296]</sup> , GCInc1 <sup>[297]</sup> , GDNF-AS1 <sup>[298]</sup> , GHRLOS <sup>[299]</sup> , GIHCG <sup>[300]</sup> , GNAS-AS1 <sup>[301]</sup> , GNG12-AS1 <sup>[302]</sup> , GPC3-AS1 <sup>[303]</sup> , GPR1-AS <sup>[304]</sup> , GSTT1-AS1 <sup>[305]</sup> , H19 <sup>[306][307][308][309][310][311][312][313][314][315][181][316]</sup> , HAR1A <sup>[317]</sup> , HAR1B <sup>[317]</sup>                                                                                                                                                              |

|                       |                                                                                                                                                                                                                                                                                                                                                                                                                                                                                                                                                                                                                                                                                                                                                                                                                                                                                                                                                                                                                                                                                                                                                                                                                                                                                                                                                                                                                                                                                                                                                                                                                                                                                                                                                                                                                                                                                                                                                                                                                                                                                                                                                                                                                                                                                                                                                                                                                                                                                                                                                                                                                                                                                                                                                                                                                                                                                                                                                                                                                                                                                                                                                                                                                                                                                                                                                                                                                                                                                                                                                                                                                                                                                                                                                                                                                                                                                                                                                                                                                                                                                                                                                                                                                                                                                                                                       |
|-----------------------|---------------------------------------------------------------------------------------------------------------------------------------------------------------------------------------------------------------------------------------------------------------------------------------------------------------------------------------------------------------------------------------------------------------------------------------------------------------------------------------------------------------------------------------------------------------------------------------------------------------------------------------------------------------------------------------------------------------------------------------------------------------------------------------------------------------------------------------------------------------------------------------------------------------------------------------------------------------------------------------------------------------------------------------------------------------------------------------------------------------------------------------------------------------------------------------------------------------------------------------------------------------------------------------------------------------------------------------------------------------------------------------------------------------------------------------------------------------------------------------------------------------------------------------------------------------------------------------------------------------------------------------------------------------------------------------------------------------------------------------------------------------------------------------------------------------------------------------------------------------------------------------------------------------------------------------------------------------------------------------------------------------------------------------------------------------------------------------------------------------------------------------------------------------------------------------------------------------------------------------------------------------------------------------------------------------------------------------------------------------------------------------------------------------------------------------------------------------------------------------------------------------------------------------------------------------------------------------------------------------------------------------------------------------------------------------------------------------------------------------------------------------------------------------------------------------------------------------------------------------------------------------------------------------------------------------------------------------------------------------------------------------------------------------------------------------------------------------------------------------------------------------------------------------------------------------------------------------------------------------------------------------------------------------------------------------------------------------------------------------------------------------------------------------------------------------------------------------------------------------------------------------------------------------------------------------------------------------------------------------------------------------------------------------------------------------------------------------------------------------------------------------------------------------------------------------------------------------------------------------------------------------------------------------------------------------------------------------------------------------------------------------------------------------------------------------------------------------------------------------------------------------------------------------------------------------------------------------------------------------------------------------------------------------------------------------------------------------|
|                       | <p>HAS2-AS1<sup>[318]</sup>, HIT<sup>[319]</sup>, HOTAIR<sup>[320][321][322][323][324][325][326][327][328][329][330][331][332][333][334][335][336][337][338][339][340][341][342][343][344][345][346][347][178][348][135][349][350][351]</sup>, HOTAIRM1<sup>[352]</sup>, HOTTIP<sup>[353][354][355][356][207]</sup>, HOXA-AS2<sup>[357]</sup>, HOXC-AS1<sup>[358]</sup>, HTTAS_v1<sup>[190]</sup>, HULC<sup>[359][360][361][362][363]</sup>, IFNG-AS1<sup>[364][365]</sup>, IGF2-AS<sup>[366]</sup>, IPW<sup>[367]</sup>, IRAIN<sup>[368][369]</sup>, JADRR<sup>[370]</sup>, JPX<sup>[371]</sup>, KCNQ1OT1<sup>[372][373][374]</sup>, LALR<sup>[375]</sup>, LINC00312<sup>[376]</sup>, LINC00473<sup>[377]</sup>, LINC00570<sup>[252]</sup>, LINC00628<sup>[378]</sup>, LINC00672<sup>[379]</sup>, LINC00673<sup>[380]</sup>, LINC00853<sup>[252]</sup>, LINC00887<sup>[381]</sup>, LINC01081<sup>[382]</sup>, LINC01116<sup>[383]</sup>, LINC01133<sup>[384]</sup>, LINC01158<sup>[385]</sup>, LINC01191<sup>[386]</sup>, LINC01207<sup>[387]</sup>, LINC01562<sup>[388]</sup>, LINC01629<sup>[381]</sup>, LINC02574<sup>[389]</sup>, LINC02575<sup>[389]</sup>, LINC-PINT<sup>[390]</sup>, lincRNA-LALR1<sup>[391]</sup>, lincRNA-p21<sup>[134]</sup>, LINC-ROR<sup>[392][393]</sup>, Lnc34a<sup>[394]</sup>, lnc-DILC<sup>[267]</sup>, lnc-NKX2-3-1<sup>[395]</sup>, LNCPRESS2<sup>[396]</sup>, lncRNA-CD244<sup>[305]</sup>, LncRNA-LALR1<sup>[391]</sup>, lnc-RTN4R-1<sup>[395]</sup>, LNCSRLR<sup>[397]</sup>, LOC100887755<sup>[252]</sup>, LOC389023<sup>[214]</sup>, LRP1-AS<sup>[398]</sup>, LRRC3DN<sup>[399]</sup>, LUADT1<sup>[400]</sup>, LUARIS<sup>[401]</sup>, LUCAT1<sup>[402]</sup>, LUNAR1<sup>[403]</sup>, MAFTRR<sup>[404]</sup>, MALAT1<sup>[405][406][407][408][409][410][411][412][413][414][415]</sup>, MAPT-AS1<sup>[416]</sup>, MEG3<sup>[417][418][419][420][421][422]</sup>, MHRT<sup>[423]</sup>, MIF-AS1<sup>[424]</sup>, MINCR<sup>[425][426]</sup>, MIR2052HG<sup>[427]</sup>, MIR210HG<sup>[381]</sup>, MRUL<sup>[428]</sup>, MYCNOS<sup>[429][430]</sup>, NALT1<sup>[431]</sup>, NBAT1<sup>[432][433]</sup>, NBR2<sup>[434][435][435]</sup>, ncNRFR<sup>[436]</sup>, ncR-PAR<sup>[437]</sup>, NCRUPAR<sup>[437]</sup>, NEAT1<sup>[438][439][440]</sup>, NFIA-AS1<sup>[441][442]</sup>, NKX2-2-AS1<sup>[443]</sup>, NORAD<sup>[444]</sup>, NRAV<sup>[445]</sup>, NRIR<sup>[446]</sup>, PACERR<sup>[447]</sup>, PAN<sup>[448][449]</sup>, PANDAR<sup>[450][451][180]</sup>, PARTICL<sup>[452][453]</sup>, PAUPAR<sup>[454][455]</sup>, PCA3<sup>[456][457]</sup>, PCAT1<sup>[458][459][251]</sup>, PCAT6<sup>[252]</sup>, PCGEM1<sup>[460][461]</sup>, PCNA-AS1<sup>[462][463][464]</sup>, PEG13<sup>[465]</sup>, PICSAR<sup>[466]</sup>, PINCR<sup>[467]</sup>, PINK1-AS<sup>[468]</sup>, PISRT1<sup>[469]</sup>, PLUT<sup>[470]</sup>, POU3F3<sup>[385]</sup>, Ppp1r1b<sup>[471]</sup>, PR antisense transcripts<sup>[472]</sup>, PRINS<sup>[473]</sup>, PRNCR1<sup>[474][460]</sup>, PTCSC2<sup>[475]</sup>, PTENP1<sup>[476]</sup>, PTENP1-AS<sup>[476]</sup>, PTPRJ-AS1<sup>[477]</sup>, PVT1<sup>[478][479][480][481][482][483][484]</sup>, RAD51-AS1<sup>[485]</sup>, RASSF1-AS1<sup>[486]</sup>, RBM5-AS1<sup>[487]</sup>, RMST<sup>[488]</sup>, RNA-a<sup>[190]</sup>, ROCR<sup>[489]</sup>, RP11-359E19.2<sup>[43]</sup>, RRP1B<sup>[490]</sup>, SBF2-AS1<sup>[491]</sup>, SCAANT1<sup>[492]</sup>, SCHLAP1<sup>[493]</sup>, snaR<sup>[494]</sup>, SNHG20<sup>[495]</sup>, SOCS2-AS1<sup>[496]</sup>, SOX2-OT<sup>[497][498]</sup>, SOX9-AS1<sup>[489]</sup>, SPRY4-IT1<sup>[499][500]</sup>, SRA<sup>[501][502][348]</sup>, TARID<sup>[503][504]</sup>, TEX41<sup>[505]</sup>, TH2LCRR<sup>[506]</sup>, THRIL<sup>[507]</sup>, TMPOP2<sup>[274]</sup>, TP53COR1<sup>[508][509]</sup>, TRAF3IP2-AS1<sup>[510]</sup>, TRERNA1<sup>[252]</sup>, TSIX<sup>[511]</sup>, TUG1<sup>[512][513][514][515][516]</sup>, TUNAR<sup>[517]</sup>, TUSC7<sup>[518]</sup>, uc.338<sup>[519]</sup>, uc.345<sup>[520]</sup>, UCA1<sup>[521][522][523][524][525][526]</sup>, UFC1<sup>[527]</sup>, UNMIBC<sup>[528]</sup>, WFDC21P<sup>[529]</sup>, WSPAR<sup>[530]</sup>, WT1-AS<sup>[531][532]</sup>, XIST<sup>[533][534][535][536][537]</sup>, YAM1<sup>[538][538]</sup>, ZFAS1<sup>[539][540]</sup></p> |
| Translational Control | <p>BACE1-AS<sup>[541][178][542]</sup>, BCYRN1<sup>[543]</sup>, BTG3-AS1<sup>[544]</sup>, FILNC1<sup>[545]</sup>, HIF1A-AS2<sup>[546]</sup>, LNCPRESS1<sup>[547]</sup>, MALAT1<sup>[548]</sup>, MSNP1AS<sup>[549]</sup>, NORAD<sup>[550]</sup>, PPP1R12A-AS1<sup>[551]</sup>, PVT1<sup>[552][553]</sup>, RBM15-AS1<sup>[554]</sup>, SATB2-AS1<sup>[555]</sup>, SNHG6<sup>[556]</sup>, UCHL1-AS1<sup>[168]</sup></p>                                                                                                                                                                                                                                                                                                                                                                                                                                                                                                                                                                                                                                                                                                                                                                                                                                                                                                                                                                                                                                                                                                                                                                                                                                                                                                                                                                                                                                                                                                                                                                                                                                                                                                                                                                                                                                                                                                                                                                                                                                                                                                                                                                                                                                                                                                                                                                                                                                                                                                                                                                                                                                                                                                                                                                                                                                                                                                                                                                                                                                                                                                                                                                                                                                                                                                                                                                                                                                                                                                                                                                                                                                                                                                                                                                                                                                                                                                                    |
