# Supplementary material for: A Single Cell but Many Different Transcripts: A Journey into the World of Long Non-Coding RNAs
Source: MDPI journal article supplement (doi:10.3390/ijms21010302), 2020-01-01
Supplement: s1 [file s1]

**Table S1.** Small peptides coded by lncRNAs and their function.

| Species                        | Gene Symbol     | Gene ID             | Peptide length | Function                              | Description                                                                                                    | Reference |
|--------------------------------|-----------------|---------------------|----------------|---------------------------------------|----------------------------------------------------------------------------------------------------------------|-----------|
| <i>Homo sapiens</i>            | SPAAR           | ENSG00000235387     | 90             | Muscle and cancer-related (oncogenic) | Negatively regulates mTORC1 activation and inhibits muscle regeneration                                        | [1]       |
|                                | MYMX            | ENSG00000262179     | 84             | Muscle-related                        | Regulates muscle development and muscle cell fusion                                                            | [2]       |
|                                | HOXB-AS3        | ENSG00000233101     | 53             | Cancer-related (tumor-suppressive)    | Suppresses colon cancer aerobic glycolysis by inhibiting hnRNP A1-dependent PKM splicing                       | [3]       |
|                                | NBDY            | ENSG00000204272     | 71             | Cancer-related and others             | Involved in mRNA processing and negatively regulates P-body association                                        | [4]       |
| <i>Mus musculus</i>            | Mrln            | ENSMUSG00000019933  | 46             | Muscle-related                        | Interacts with SERCA (calcium-ATPase) and inhibits calcium reuptake into the sarcoplasmic reticulum            | [5]       |
|                                | Strit1          | ENSMUSG00000103476  | 34             | Muscle-related                        | Enhances SERCA activity and calcium reuptake into the sarcoplasmic reticulum                                   | [6]       |
|                                | Spaar           | ENSMUSG00000028475  | 75             | Muscle and cancer-related (oncogenic) | Negatively regulates mTORC1 activation and inhibits muscle regeneration                                        | [1]       |
|                                | Mymx            | ENSMUSG00000079471  | 84             | Muscle-related                        | Regulates muscle development and muscle cell fusion                                                            | [2][7]    |
| Danio Rerio                    | apela           | ENSDARG000000094729 | 58             | Others                                | Activates G protein-coupled apelin receptor (APJ)/APJ signaling and promotes cell movement during gastrulation | [8]       |
| <i>Drosophila melanogaster</i> | tal-1A/2A/3A/AA | FBgn0087003         | 11 and 32      | Others                                | Activates the transcription factor responsible for cuticle formation                                           | [9]       |
|                                | ScIB            | FBgn0266492         | 28 and 29      | Muscle-related                        | Regulates calcium transport and muscle contraction                                                             | [10]      |
|                                | pgc             | FBgn0016053         | 71             | Others                                | Represses CTD2 serine phosphorylation in germline progenitor cells                                             | [11]      |
| <i>Glycine max</i>             | ENOD40A/B       | SOY:0001919         | 12 and 24      | Others                                | Interacts with sucrose synthase and is required for plant–bacteria symbiotic interactions                      | [12]      |
